# Supplementary material
Source: PubMed Central journal article supplement (PMC5757373)

B

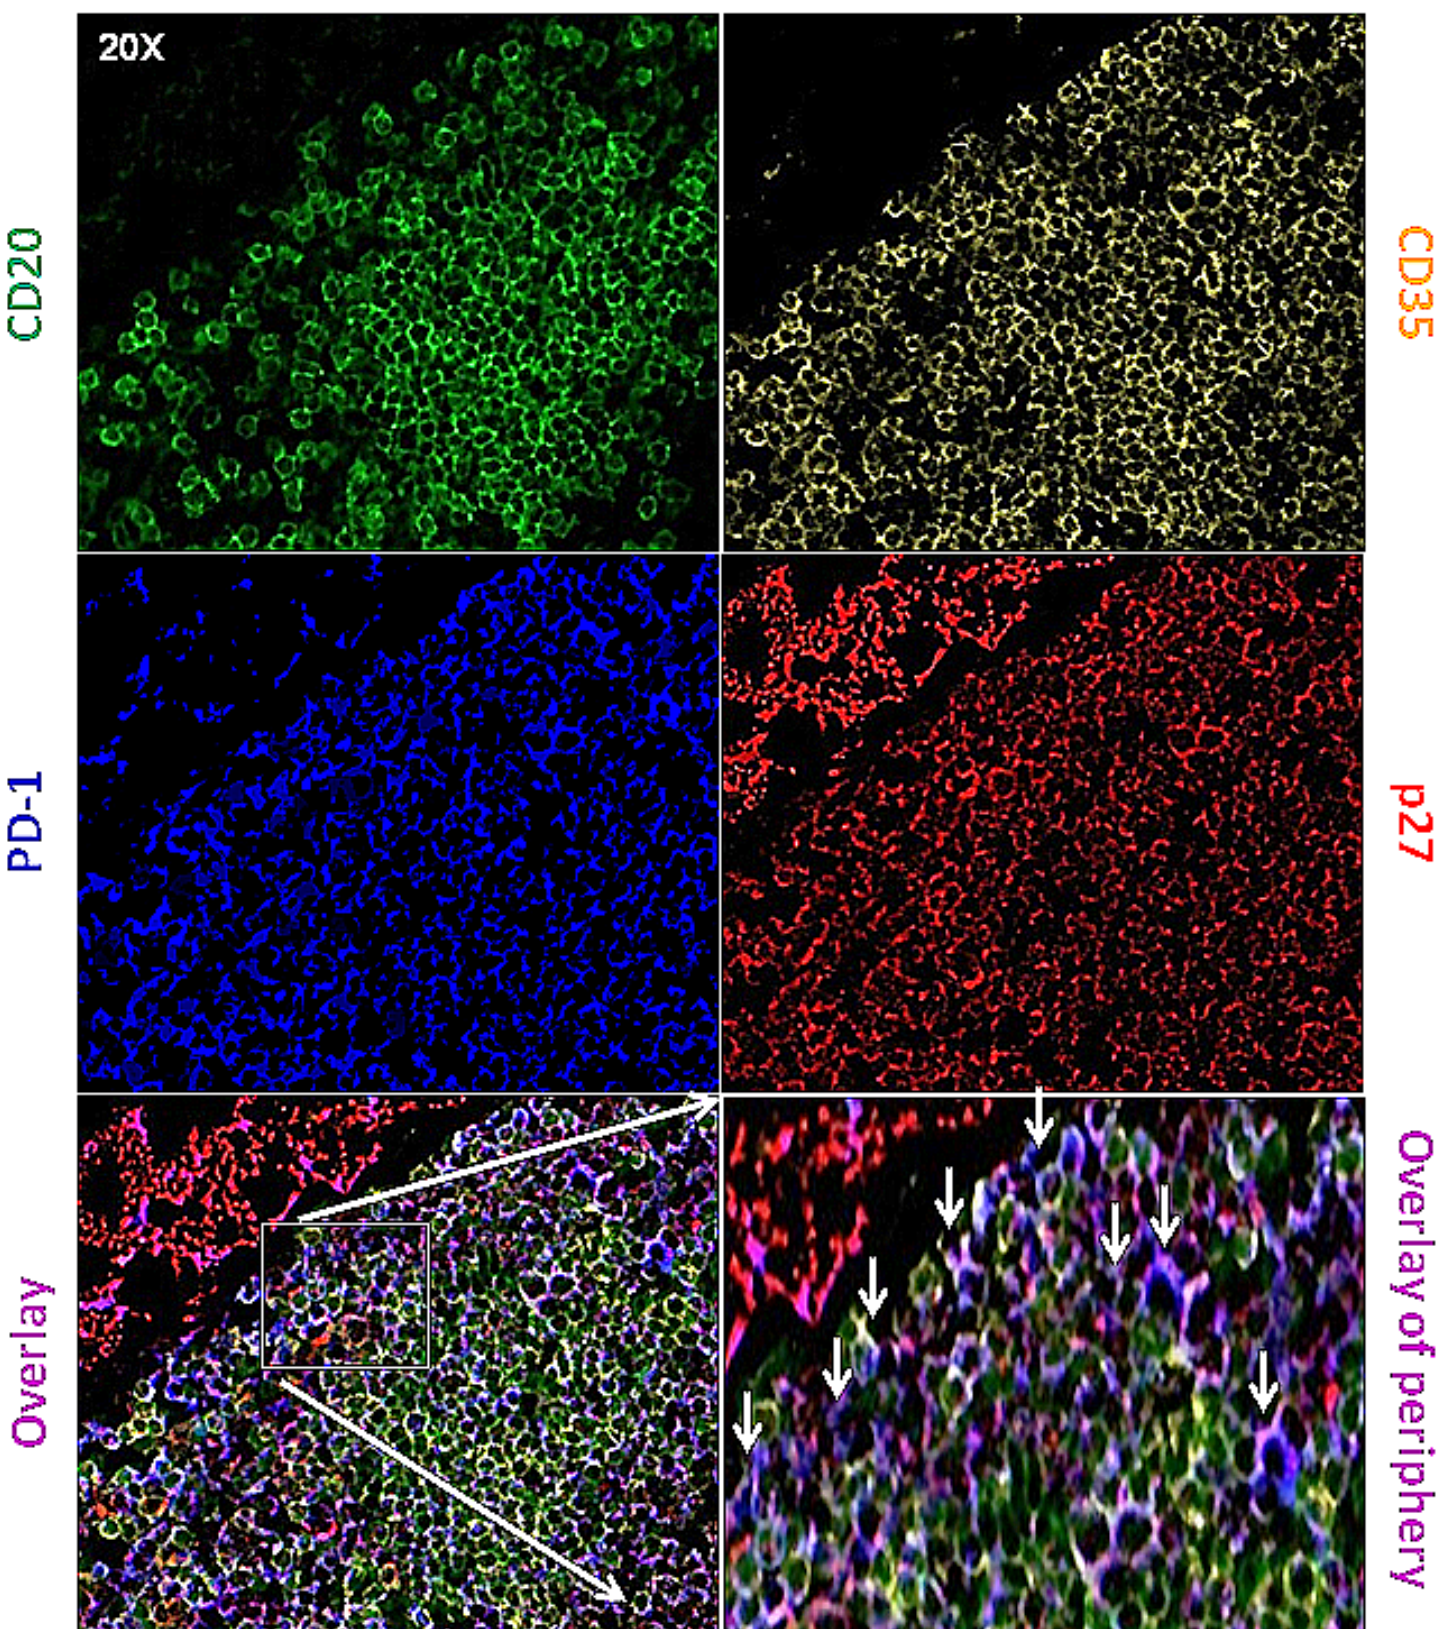

Supplement: NIHMS931301-supplement-11481_2017_9775_MOESM1_ESM.pdf [file NIHMS931301-supplement-11481_2017_9775_MOESM1_ESM.pdf]
